# Supplementary material
Source: PubMed Central journal article supplement (PMC6543713)
Supplement: rccm.201807-1220OC_lutsey_data_supplement.pdf [file rccm.201807-1220OC_lutsey_data_supplement.pdf]

## **SUPPLEMENTAL METHODS**

### **Impaired lung function, lung disease and risk of incident dementia**

#### Spirometry measurements

Pulmonary function was assessed at baseline using a water-sealed Collins Survey II volume displacement spirometer (Collins Medical, Braintree, MA) and PULMO-SCREEN II software (PDS Healthcare Products, Louisville, CO). Spirometry was conducted using American Thoracic Society guidelines,(1) using a protocol standardized across the four field centers, with training and certification of pulmonary technicians and extensive quality assurance throughout the study.(2) For each participant, at least three acceptable spirometry tests were sought from a minimum of five forced expirations. At least two were required to be reproducible (volumes within +/-5%). A best reading was then selected by computer software and confirmed by a technician using American Thoracic Society criteria for acceptability. Spirometry measures used in this analysis are FEV1, FVC, and the FEV1/FVC ratio. Each measure as a percentage of age-, race-, and sex-specific predicted values and lower limit of normal (LLN) values of each metric were calculated using equations published by Hankinson et al.(3) Bronchodilator (beta2-agonist) response was not evaluated.

#### Covariates & Potential Effect Modifiers

Covariate information was obtained at baseline, concurrent with exposure measurement. Questionnaires were used to ascertain age, sex, education, race-center, cigarette smoking, pack-years of smoking, physical activity, and prevalent coronary heart disease, stroke and heart

failure. Participants were asked to bring all medications taken in the two weeks prior to the exam; all medication names were recorded. Height and weight were measured, body mass index calculated as height (m)/weight (kg)<sup>2</sup>. Sitting blood pressure was measured with a random-zero sphygmomanometer after a five minute rest. A total of three measurements were taken, the mean of the latter two was used in analysis.

Fasting serum and plasma samples were drawn and stored at –80°C. Total plasma cholesterol and triglycerides were determined by enzymatic methods. HDL-C was measured after dextran-magnesium precipitation, and the Friedewald equation(4) was used to calculate LDL-C in participants. Diabetes was defined as a fasting blood glucose  $\geq 126$  mg/dL, non-fasting blood glucose  $\geq 200$  mg/dL, a self-reported physician diagnosis of diabetes, or current use of antidiabetic medication. Methods for the measurement and classification of the APOE  $\epsilon 4$  risk allele have been described elsewhere.(5)

### Dementia adjudication

For the 6,471 participants who underwent a detailed neurocognitive assessment, an expert panel adjudicated syndromic dementia and MCI based on a full neuropsychological assessment plus a functional activities questionnaire (FAQ), a clinical dementia rating (CDR) interview (administered separately to the participant and the informant) and a neuropsychiatric inventory (NPI) interview (administered to the informant only). Interviews were conducted using standardized protocols and by certified staff, and quality control of interviewer performance was monitored via review of audiotaped recordings. For individuals who were seen in-person and given diagnoses of dementia or MCI, etiologic diagnoses were assigned by a panel of physicians and neuropsychologists.(6) The panel was required to designate one

etiology as primary, though they were allowed to diagnose more than one etiology. Diagnosis of dementia or MCI due to AD etiology followed criteria from the National Institute on Aging-Alzheimer's Association (NIA-AA) workgroups,(7, 8) and was based on the presence of a cognitive syndrome that is not of abrupt onset and includes memory or non-memory (e.g. language or visuospatial) presentations, and the absence of features of other specific diagnoses sufficient to cause the cognitive impairment. Cardiovascular disease-related MCI and dementia was defined by an algorithm based in the National Institute of Neurological Disorders and Stroke-Association Internationale pour la Recherche et l'Enseignement en Neurosciences criteria.(9) For the present analysis we did not specifically evaluate dementia and MCI attributed to other etiologies (e.g. Lewy body disease) due to the low prevalence of these conditions in our sample.

### IPW Weights

Inverse probability weighting (IPW) was used to adjust for attrition due to either death or failure to attend the follow-up neurocognitive exam (censoring). For each individual we separately modeled estimated probabilities of i) being alive at the time of the follow-up neurocognitive exam and ii) participating in the follow-up neurocognitive exam, conditional on being alive at the time of the follow-up neurocognitive exam. Weights were calculated as the inverse of estimates probabilities. Stabilized weights as the ratio of two probabilities were used. Values of the stabilized weights beyond the extreme 1<sup>st</sup> and 99<sup>th</sup> percentiles were winsorized to the values at the 1<sup>st</sup> and 99<sup>th</sup> percentiles.

Logistic models for IPW weights included the following variables measured at visit 1: age, sex, education, race-center, APOE, cigarette smoking, pack-years of smoking, physical activity, body mass index, systolic blood pressure, antihypertensive medications, diabetes, HDL cholesterol, LDL cholesterol, lipid lower medication, prevalent coronary heart disease, stroke, heart failure, lung function impairment, the forced expiratory volume in one second (FEV1), forced vital capacity (FVC), the FEV1/FVC ratio, FEV1% predicted, FVC% predicted, FEV1/FVC% predicted, global z-score for three cognitive tests (Delayed Word Recall Test, Digit Symbol Substitution Test, and Word Fluency Test), and incident dementia. Logistic models for estimates of the numerators of the stabilized weights included age, gender, education, race-center, APOE, cigarette smoking, and pack-years of smoking.

The c-statistics for visit 5 participation and survival were 0.694 and 0.816, respectively.

#### **Weights mean (SD) by Visit 5 status**

Visit 5 attendee: 2.26 (1.65); min = 1.20, max = 11.94

Visit 5 nonattendee: 5.19 (3.83); min = 1.20, max = 11.94

#### **Stabilized weights mean (SD) by Visit 5 status**

Visit 5 attendee: 0.98 (0.37); min = 0.46, max = 3.09

Visit 5 nonattendee: 1.41 (0.83); min = 0.46, max = 3.09

## References

1. Standardization of spirometry--1987 update. Statement of the American Thoracic Society. *Am Rev Respir Dis* 1987; 136: 1285-1298.
2. The ARIC Investigators. Atherosclerosis Risk in Communities Study Manual 4: Pulmonary Function. Chapel Hill, NC; National Heart, Lung, and Blood Institute of the National Institutes of Health, Collaborative Studies Coordinating Center: Chapel Hill, NC; 1987.
3. Hankinson JL, Odencrantz JR, Fedan KB. Spirometric reference values from a sample of the general U.S. population. *Am J Respir Crit Care Med* 1999; 159: 179-187.
4. Friedewald WT, Levy RI, Fredrickson DS. Estimation of the Concentration of Low-Density Lipoprotein Cholesterol in Plasma, Without Use of the Preparative Ultracentrifuge. *Clinical Chemistry* 1972; 18: 499-502.
5. Pathan SS, Gottesman RF, Mosley TH, Knopman DS, Sharrett AR, Alonso A. Association of lung function with cognitive decline and dementia: the Atherosclerosis Risk in Communities (ARIC) Study. *Eur J Neurol* 2011; 18: 888-898.
6. Knopman DS, Gottesman RF, Sharrett AR, Wruck LM, Windham BG, Coker L, Schneider AL, Hengrui S, Alonso A, Coresh J, Albert MS, Mosley TH, Jr. Mild Cognitive Impairment and Dementia Prevalence: The Atherosclerosis Risk in Communities Neurocognitive Study (ARIC-NCS). *Alzheimers Dement (Amst)* 2016; 2: 1-11.
7. McKhann GM, Knopman DS, Chertkow H, Hyman BT, Jack CR, Jr., Kawas CH, Klunk WE, Koroshetz WJ, Manly JJ, Mayeux R, Mohs RC, Morris JC, Rossor MN, Scheltens P, Carrillo MC, Thies B, Weintraub S, Phelps CH. The diagnosis of dementia due to Alzheimer's disease: recommendations from the National Institute on Aging-Alzheimer's Association workgroups on diagnostic guidelines for Alzheimer's disease. *Alzheimers Dement* 2011; 7: 263-269.
8. Albert MS, DeKosky ST, Dickson D, Dubois B, Feldman HH, Fox NC, Gamst A, Holtzman DM, Jagust WJ, Petersen RC, Snyder PJ, Carrillo MC, Thies B, Phelps CH. The diagnosis of mild cognitive impairment due to Alzheimer's disease: recommendations from the National Institute on Aging-Alzheimer's Association workgroups on diagnostic guidelines for Alzheimer's disease. *Alzheimers Dement* 2011; 7: 270-279.
9. Roman GC, Tatemichi TK, Erkinjuntti T, Cummings JL, Masdeu JC, Garcia JH, Amaducci L, Orgogozo JM, Brun A, Hofman A, et al. Vascular dementia: diagnostic criteria for research studies. Report of the NINDS-AIREN International Workshop. *Neurology* 1993; 43: 250-260.

## SUPPLEMENTAL TABLES

### Impaired lung function, lung disease and risk of incident dementia

#### Supplemental Table 1.

Baseline characteristics (1987-1989) stratified by neurocognitive study (2011-2013) participation status<sup>a</sup>: The Atherosclerosis Risk in Communities (ARIC) study.

#### Supplemental Table 2

Baseline characteristics according to forced vital capacity (FVC) percent of predicted: The Atherosclerosis Risk in Communities (ARIC) study, 1987-1989

#### Supplemental Table 3

Lung function disease categories, objective indices of lung function, and risk of incident dementia among nonsmokers: The Atherosclerosis Risk in Communities (ARIC) study, 1996-2013

#### Supplemental Table 4

Lung function disease categories, objective indices of lung function, and risk of incident dementia among blacks and whites: The Atherosclerosis Risk in Communities (ARIC) study, 1996-2013

#### Supplemental Table 5

Objective indices of lung function and risk of incident dementia according to follow-up time\*: The Atherosclerosis Risk in Communities (ARIC) study, 1996-2013

#### Supplemental Table 6

Weighted\* odds ratios (ORs) and 95% confidence intervals (CI) of lung disease categories and objective lung function measures with dementia or MCI among never smokers: The Atherosclerosis Risk in Communities (ARIC) study, 1987-2013

#### Supplemental Table 7

Race-stratified weighted\* odds ratios (ORs) and 95% confidence intervals (CI) of lung disease categories, FEV1% predicted, FVC% predicted and FEV1/FVC% predicted with dementia or MCI: The Atherosclerosis Risk in Communities (ARIC) study, 1987-2013

#### Supplemental Table 8 – FEV1/FVC% predicted & adjudicated outcomes

Inverse-probability weighted odds ratios (OR) and 95% confidence intervals (CI) of FEV1/FEC percent of predicted quartile categories with dementia, mild cognitive impairment (MCI), Alzheimer's disease and cerebrovascular disease: The Atherosclerosis Risk in Communities (ARIC) study, 1987-2013

**Supplemental Table 9**

Odds ratios (ORs) and 95% confidence intervals (CI) of lung disease categories with dementia, mild cognitive impairment (MCI), AD-type dementia or MCI, and dementia or MCI due to cerebrovascular disease: The Atherosclerosis Risk in Communities (ARIC) study, 1987-2013

**Supplemental Table 10**

Odds ratios (ORs) and 95% confidence intervals (CI) of FEV1 percent predicted quartile with dementia, mild cognitive impairment (MCI), AD-type dementia or MCI, and dementia or MCI due to cerebrovascular disease: The Atherosclerosis Risk in Communities (ARIC) study, 1987-2013

**Supplemental Table 11**

Odds ratios (ORs) and 95% confidence intervals (CI) of FVC percent predicted quartile with dementia, mild cognitive impairment (MCI), AD-type dementia or MCI, and dementia or MCI due to cerebrovascular disease: The Atherosclerosis Risk in Communities (ARIC) study, 1987-2013

**Supplemental Table 1.**

Baseline characteristics (1987-1989) stratified by neurocognitive study (2011-2013) participation status<sup>a</sup>: The Atherosclerosis Risk in Communities (ARIC) study.

|                                                         | Neurocognitive Study Participation Status <sup>a</sup> |                      |                                        |                                         |
|---------------------------------------------------------|--------------------------------------------------------|----------------------|----------------------------------------|-----------------------------------------|
|                                                         | <i>N</i>                                               | Participant<br>5,889 | Nonparticipant<br>still alive<br>3,087 | Nonparticipant<br>due to death<br>5,208 |
| <b>Demographics</b>                                     |                                                        |                      |                                        |                                         |
| Age, years                                              |                                                        | 52.1 (5.2)           | 53.7 (5.6)                             | 56.8 (5.4)                              |
| Female, %                                               |                                                        | 59.3                 | 63.5                                   | 45.9                                    |
| African American, %                                     |                                                        | 22.8                 | 24.8                                   | 30.1                                    |
| Education level, %                                      |                                                        |                      |                                        |                                         |
| <High school                                            |                                                        | 15.0                 | 22.9                                   | 33.3                                    |
| High school graduate                                    |                                                        | 41.6                 | 44.0                                   | 38.3                                    |
| College/Graduate school                                 |                                                        | 43.4                 | 33.1                                   | 28.3                                    |
| <b>Behaviors</b>                                        |                                                        |                      |                                        |                                         |
| Smoking status, %                                       |                                                        |                      |                                        |                                         |
| Current                                                 |                                                        | 17.7                 | 22.7                                   | 37.0                                    |
| Former                                                  |                                                        | 32.8                 | 30.1                                   | 31.4                                    |
| Never                                                   |                                                        | 49.5                 | 47.2                                   | 31.6                                    |
| Pack-years*                                             |                                                        | 13.4 (7.5, 31.0)     | 15.7 (9.7, 34.0)                       | 24.7 (17.2, 45.0)                       |
| Physical activity**                                     |                                                        | 2.5 (0.8)            | 2.4 (0.8)                              | 2.4 (0.8)                               |
| <b>Respiratory Indicators</b>                           |                                                        |                      |                                        |                                         |
| FEV1%, pred                                             |                                                        | 97.3 (14.3)          | 95.9 (15.1)                            | 87.7 (19.3)                             |
| FVC%, pred                                              |                                                        | 100.9 (13.1)         | 99.7 (13.6)                            | 94.0 (15.7)                             |
| FEV1/FVC %, pred                                        |                                                        | 95.8 (7.9)           | 95.6 (8.4)                             | 92.3 (12.3)                             |
| FEV1, Liter                                             |                                                        | 3.0 (0.7)            | 2.8 (0.7)                              | 2.6 (0.8)                               |
| FVC, Liter                                              |                                                        | 3.9 (1.0)            | 3.8 (1.0)                              | 3.6 (1.0)                               |
| FEV1/FVC                                                |                                                        | 75.8 (6.4)           | 75.5 (6.8)                             | 72.0 (9.9)                              |
| Self-reported symptoms, %                               |                                                        |                      |                                        |                                         |
| Cough                                                   |                                                        | 8.0                  | 10.8                                   | 18.3                                    |
| Phlegm                                                  |                                                        | 6.2                  | 8.2                                    | 14.3                                    |
| Dyspnea                                                 |                                                        | 4.6                  | 7.4                                    | 12.6                                    |
| Self-reported MD diagnosis, %                           |                                                        |                      |                                        |                                         |
| Bronchitis                                              |                                                        | 6.6                  | 7.6                                    | 10.8                                    |
| Emphysema                                               |                                                        | 0.6                  | 0.7                                    | 3.6                                     |
| Asthma                                                  |                                                        | 5.1                  | 5.8                                    | 6.9                                     |
| <b>Lung disease categories, %</b>                       |                                                        |                      |                                        |                                         |
| COPD pattern                                            |                                                        | 12.4                 | 14.1                                   | 25.5                                    |
| Restrictive impairment pattern                          |                                                        | 4.1                  | 4.9                                    | 8.5                                     |
| Respiratory symptoms with<br>normal spirometric results |                                                        | 33.4                 | 34.6                                   | 33.0                                    |
| Normal                                                  |                                                        | 50.1                 | 46.5                                   | 33.1                                    |



---

**Other Physiologic Characteristics**

|                                    |              |              |              |
|------------------------------------|--------------|--------------|--------------|
| Body mass index, kg/m <sup>2</sup> | 27.2 (4.9)   | 27.6 (5.3)   | 28.3 (5.8)   |
| Systolic blood pressure, mmHg      | 116.6 (16.0) | 120.2 (17.2) | 126.3 (20.5) |
| Antihypertensive medications, %    | 17.6         | 23.5         | 33.7         |
| Prevalent diabetes, %              | 5.9          | 8.0          | 19.4         |
| HDL cholesterol, mg/dL             | 53.4 (16.8)  | 53.2 (16.9)  | 49.3 (16.8)  |
| LDL cholesterol, mg/dL             | 134.3 (38.1) | 138.9 (39.5) | 140.5 (40.0) |
| Lipid lowering medication, %       | 2.1          | 3.0          | 3.5          |
| Prevalent CHD, %                   | 1.8          | 3.7          | 6.4          |
| Prevalent HF, %                    | 2.5          | 3.5          | 7.5          |
| Prevalent Stroke, %                | 3.7          | 3.7          | 6.4          |
| APOE, %                            |              |              |              |
| e4/e4                              | 2.2          | 2.3          | 3.3          |
| e2/e4 or e3/e4                     | 26.4         | 27.4         | 30.0         |
| Other                              | 71.4         | 70.3         | 66.7         |

---

Data shown as mean (SD) or percentage except for \*geometric mean (interquartile range)

\*among smokers

\*\*Score on the sport index of the Baecke physical activity questionnaire[1]

<sup>a</sup>Neurocognitive study attendance status defined as attending ARIC visit 5 and not missing dementia status

---

## Supplemental Table 2

Baseline characteristics according to forced vital capacity (FVC) percent of predicted: The Atherosclerosis Risk in Communities (ARIC) study, 1987-1989

|                               | FVC%, predicted   |                   |                   |                  |                  |
|-------------------------------|-------------------|-------------------|-------------------|------------------|------------------|
|                               | Quintile 1        | Quintile 2        | Quintile 3        | Quintile 4       | Quintile 5       |
|                               | <86.7             | 86.7-94.9         | 95.0-101.7        | 101.8-109.8      | >109.8           |
| <i>N</i>                      | 2,836             | 2,838             | 2,835             | 2,839            | 2,836            |
| <b>Demographics</b>           |                   |                   |                   |                  |                  |
| Age, years                    | 55.1 (5.7)        | 54.2 (5.7)        | 54.0 (5.6)        | 53.7 (5.8)       | 53.8 (5.9)       |
| Female, %                     | 55.0              | 51.8              | 55.5              | 55.5             | 58.7             |
| African American, %           | 25.3              | 22.9              | 23.8              | 24.9             | 32.6             |
| Education level, %            |                   |                   |                   |                  |                  |
| <High school                  | 31.7              | 22.1              | 22.5              | 20.3             | 20.6             |
| High school graduate          | 39.6              | 43.5              | 40.7              | 41.5             | 39.5             |
| College/Graduate school       | 28.8              | 34.5              | 36.8              | 38.2             | 40.0             |
| <b>Behaviors</b>              |                   |                   |                   |                  |                  |
| Smoking status, %             |                   |                   |                   |                  |                  |
| Current                       | 39.4              | 28.0              | 23.3              | 20.3             | 18.3             |
| Former                        | 29.2              | 32.7              | 30.4              | 34.1             | 32.3             |
| Never                         | 31.4              | 39.4              | 46.4              | 45.6             | 49.4             |
| Pack-years*                   | 25.6 (18.8, 45.0) | 20.4 (13.5, 41.0) | 17.3 (10.0, 37.9) | 15.1 (8.4, 33.0) | 12.5 (6.8, 30.0) |
| Physical activity             | 2.3 (0.8)         | 2.4 (0.8)         | 2.5 (0.8)         | 2.5 (0.8)        | 2.5 (0.8)        |
| <b>Respiratory Indicators</b> |                   |                   |                   |                  |                  |
| FEV1%, pred                   | 72.0 (14.4)       | 87.4 (9.0)        | 94.9 (8.5)        | 101.2 (8.6)      | 111.9 (10.7)     |
| FVC%, pred                    | 77.6 (8.6)        | 91.1 (2.3)        | 98.4 (1.9)        | 105.5 (2.3)      | 117.9 (7.3)      |
| FEV1/FVC %, pred              | 91.8 (14.3)       | 95.3 (9.5)        | 95.8 (8.4)        | 95.3 (7.9)       | 94.4 (7.8)       |
| FEV1, Liter                   | 2.2 (0.6)         | 2.7 (0.6)         | 2.9 (0.6)         | 3.1 (0.7)        | 3.3 (0.8)        |
| FVC, Liter                    | 3.0 (0.7)         | 3.6 (0.8)         | 3.8 (0.8)         | 4.1 (0.9)        | 4.4 (1.0)        |
| FEV1/FVC                      | 72.1 (11.6)       | 74.8 (7.7)        | 75.4 (6.8)        | 75.0 (6.5)       | 74.5 (6.4)       |
| Self-reported symptoms        |                   |                   |                   |                  |                  |
| Cough, %                      | 22.0              | 12.5              | 10.7              | 8.8              | 8.0              |

|                                          |              |              |              |              |              |
|------------------------------------------|--------------|--------------|--------------|--------------|--------------|
| Phlem, %                                 | 17.5         | 9.5          | 8.3          | 6.6          | 6.1          |
| Dyspnea, %                               | 16.6         | 8.1          | 6.9          | 5.2          | 3.9          |
| Self-reported MD diagnosis               |              |              |              |              |              |
| Bronchitis, %                            | 14.1         | 9.4          | 6.9          | 6.0          | 5.3          |
| Emphysema, %                             | 4.6          | 1.4          | 1.2          | 0.6          | 0.9          |
| Asthma, %                                | 10.2         | 5.9          | 5.0          | 4.3          | 4.1          |
| <b>Other Physiologic Characteristics</b> |              |              |              |              |              |
| Body mass index, kg/m <sup>2</sup>       | 28.9 (6.2)   | 28.0 (5.5)   | 27.6 (5.3)   | 27.1 (4.8)   | 26.7 (4.6)   |
| Systolic blood pressure, mmHg            | 124.5 (20.2) | 121.1 (18.3) | 120.8 (19.0) | 119.8 (17.2) | 118.5 (17.4) |
| Antihypertensive medications, %          | 33.0         | 25.9         | 25.4         | 21.1         | 18.7         |
| Prevalent diabetes, %                    | 18.2         | 12.3         | 10.1         | 9.3          | 6.6          |
| HDL cholesterol, mg/dL                   | 48.8 (16.3)  | 50.3 (16.5)  | 51.8 (16.6)  | 52.7 (16.9)  | 55.7 (17.5)  |
| LDL cholesterol, mg/dL                   | 137.8 (39.7) | 138.1 (38.6) | 138.5 (39.5) | 137.8 (39.1) | 135.7 (39.3) |
| Lipid lowering medication, %             | 3.1          | 3.2          | 2.3          | 2.7          | 2.6          |
| Prevalent CHD, %                         | 9.0          | 4.8          | 4.1          | 3.4          | 1.8          |
| Prevalent HF, %                          | 9.3          | 4.3          | 3.9          | 2.9          | 2.4          |
| Prevalent Stroke, %                      | 6.1          | 5.5          | 4.5          | 3.6          | 3.6          |
| APOE, %                                  |              |              |              |              |              |
| e4/e4                                    | 2.4          | 2.4          | 2.6          | 3.1          | 2.5          |
| e2/e4 or e3/e4                           | 28.1         | 27.3         | 27.7         | 28.5         | 28.3         |
| Other                                    | 69.5         | 70.3         | 69.7         | 68.4         | 69.2         |

---

**Data shown as mean (SD) or percentage except for \*geometric mean (interquartile range)**

---

### Supplemental Table 3

Lung function disease categories, objective indices of lung function, and risk of incident dementia among nonsmokers: The Atherosclerosis Risk in Communities (ARIC) study, 1996-2013

|                          | Lung Function Category |                                                      |                                |                   |
|--------------------------|------------------------|------------------------------------------------------|--------------------------------|-------------------|
|                          | Normal                 | Respiratory symptoms with normal spirometric results | Restrictive impairment pattern | COPD pattern      |
| <i>N</i>                 | 3,301                  | 1,920                                                | 294                            | 503               |
| Dementia cases, <i>n</i> | 335                    | 229                                                  | 34                             | 62                |
| Person-years             | 71,727                 | 40,457                                               | 5,724                          | 10,654            |
| Incident Rate*           | 4.7                    | 5.7                                                  | 5.9                            | 5.8               |
| Hazard ratio (95% CI)    |                        |                                                      |                                |                   |
| Model 1                  | 1                      | 1.18 (1.00, 1.40)                                    | 1.45 (1.02, 2.08)              | 1.41 (1.07, 1.85) |
| Model 3                  | 1                      | 1.07 (0.90, 1.28)                                    | 1.12 (0.78, 1.62)              | 1.31 (0.99, 1.72) |

  

|                          | FEV1%, predicted  |                   |                   |                   |            | Trend<br>(per 1 SD decrease) |
|--------------------------|-------------------|-------------------|-------------------|-------------------|------------|------------------------------|
|                          | Quintile 1        | Quintile 2        | Quintile 3        | Quintile 4        | Quintile 5 |                              |
| <i>N</i>                 | 654               | 1,058             | 1,291             | 1,429             | 1,586      |                              |
| Dementia cases, <i>n</i> | 80                | 129               | 112               | 149               | 190        |                              |
| Person-years             | 12,873            | 22,374            | 27,706            | 31,014            | 34,595     |                              |
| Incident Rate*           | 6.2               | 5.8               | 4.0               | 4.8               | 5.5        |                              |
| Hazard ratio (95% CI)    |                   |                   |                   |                   |            |                              |
| Model 1                  | 1.38 (1.06, 1.80) | 1.14 (0.91, 1.43) | 0.83 (0.65, 1.05) | 0.98 (0.79, 1.22) | 1          | 1.13 (1.03, 1.25)            |
| Model 3                  | 1.13 (0.86, 1.48) | 1.03 (0.82, 1.29) | 0.72 (0.57, 0.92) | 0.90 (0.72, 1.12) | 1          | 1.05 (0.97, 1.17)            |

  

|          | FVC%, predicted |            |            |            |            | Trend<br>(per 1 SD decrease) |
|----------|-----------------|------------|------------|------------|------------|------------------------------|
|          | Quintile 1      | Quintile 2 | Quintile 3 | Quintile 4 | Quintile 5 |                              |
| <i>N</i> | 891             | 1,117      | 1,315      | 1,294      | 1,401      |                              |

|                                                                                                                                                                                                                                                                                            |                   |                   |                   |                   |            |                              |
|--------------------------------------------------------------------------------------------------------------------------------------------------------------------------------------------------------------------------------------------------------------------------------------------|-------------------|-------------------|-------------------|-------------------|------------|------------------------------|
| Dementia cases, <i>n</i>                                                                                                                                                                                                                                                                   | 113               | 129               | 116               | 145               | 157        |                              |
| Person-years                                                                                                                                                                                                                                                                               | 17,756            | 23,490            | 28,390            | 28,077            | 30,848     |                              |
| Incident Rate*                                                                                                                                                                                                                                                                             | 6.4               | 5.5               | 4.1               | 5.2               | 5.1        |                              |
| Hazard ratio (95% CI)                                                                                                                                                                                                                                                                      |                   |                   |                   |                   |            |                              |
| Model 1                                                                                                                                                                                                                                                                                    | 1.44 (1.13, 1.84) | 1.16 (0.92, 1.46) | 0.95 (0.75, 1.21) | 1.14 (0.91, 1.43) | 1          | 1.14 (1.04, 1.23)            |
| Model 3                                                                                                                                                                                                                                                                                    | 1.15 (0.89, 1.49) | 1.08 (0.85, 1.37) | 0.81 (0.64, 1.04) | 1.08 (0.86, 1.36) | 1          | 1.06 (0.99, 1.16)            |
| <b>FEV1/FVC%, predicted</b>                                                                                                                                                                                                                                                                |                   |                   |                   |                   |            |                              |
|                                                                                                                                                                                                                                                                                            | Quintile 1        | Quintile 2        | Quintile 3        | Quintile 4        | Quintile 5 | Trend<br>(per 1 SD decrease) |
| <i>N</i>                                                                                                                                                                                                                                                                                   | 621               | 1,114             | 1,305             | 1,422             | 1,556      |                              |
| Dementia cases, <i>n</i>                                                                                                                                                                                                                                                                   | 76                | 89                | 136               | 158               | 201        |                              |
| Person-years                                                                                                                                                                                                                                                                               | 13,185            | 24,186            | 28,036            | 30,382            | 32,772     |                              |
| Incident Rate*                                                                                                                                                                                                                                                                             | 5.8               | 3.7               | 4.9               | 5.2               | 6.1        |                              |
| Hazard ratio (95% CI)                                                                                                                                                                                                                                                                      |                   |                   |                   |                   |            |                              |
| Model 1                                                                                                                                                                                                                                                                                    | 1.03 (0.79, 1.34) | 0.70 (0.54, 0.90) | 0.89 (0.72, 1.11) | 0.91 (0.74, 1.13) | 1          | 0.98 (0.89, 1.08)            |
| Model 3                                                                                                                                                                                                                                                                                    | 1.02 (0.78, 1.34) | 0.74 (0.57, 0.96) | 0.93 (0.74, 1.16) | 0.94 (0.76, 1.16) | 1          | 0.99 (0.89, 1.09)            |
| *Per 1,000 person-years                                                                                                                                                                                                                                                                    |                   |                   |                   |                   |            |                              |
| Model 1: Cox regression adjusted for age, sex, center, education level, and race-center (5-level variable)                                                                                                                                                                                 |                   |                   |                   |                   |            |                              |
| Model 2: Model 1 + additional adjustment for cigarette smoking and pack-years of smoking                                                                                                                                                                                                   |                   |                   |                   |                   |            |                              |
| Model 3: Model 2 + additional adjustment for physical activity, body mass index, systolic blood pressure, blood pressure medication use, diabetes, HDL cholesterol, LDL cholesterol, lipid lowering medications, prevalent coronary heart disease, heart failure, stroke and APOE genotype |                   |                   |                   |                   |            |                              |

### Supplemental Table 4

Lung function disease categories, objective indices of lung function, and risk of incident dementia among blacks and whites: The Atherosclerosis Risk in Communities (ARIC) study, 1996-2013

|                          | Lung Function Category |                                                      |                                |                   | p-race interaction |                           |                    |
|--------------------------|------------------------|------------------------------------------------------|--------------------------------|-------------------|--------------------|---------------------------|--------------------|
|                          | Normal                 | Respiratory symptoms with normal spirometric results | Restrictive impairment pattern | COPD pattern      |                    |                           |                    |
| <b>Blacks</b>            |                        |                                                      |                                |                   |                    |                           |                    |
| Dementia cases, <i>n</i> | 208                    | 176                                                  | 19                             | 68                |                    |                           |                    |
| Person-years             | 34,058                 | 25,185                                               | 2,969                          | 9,367             |                    |                           |                    |
| Incident Rate*           | 6.1                    | 7.0                                                  | 6.4                            | 7.3               |                    |                           |                    |
| Hazard ratio (95% CI)    |                        |                                                      |                                |                   |                    |                           |                    |
| Model 1                  | 1                      | 1.20 (0.98, 1.47)                                    | 1.32 (0.82, 2.12)              | 1.40 (1.06, 1.85) | P=0.64             |                           |                    |
| Model 2                  | 1                      | 1.21 (0.98, 1.48)                                    | 1.32 (0.82, 2.12)              | 1.43 (1.07, 1.92) | P=0.54             |                           |                    |
| Model 3                  | 1                      | 1.14 (0.92, 1.41)                                    | 1.23 (0.76, 1.98)              | 1.31 (0.98, 1.76) | P=0.49             |                           |                    |
| <b>Whites</b>            |                        |                                                      |                                |                   |                    |                           |                    |
| Dementia cases, <i>n</i> | 408                    | 307                                                  | 60                             | 161               |                    |                           |                    |
| Person-years             | 96,045                 | 71,529                                               | 12,516                         | 36,645            |                    |                           |                    |
| Incident Rate*           | 4.2                    | 4.3                                                  | 4.8                            | 4.4               |                    |                           |                    |
| Hazard ratio (95% CI)    |                        |                                                      |                                |                   |                    |                           |                    |
| Model 1                  | 1                      | 1.05 (0.91, 1.22)                                    | 1.34 (1.02, 1.75)              | 1.17 (0.97, 1.41) |                    |                           |                    |
| Model 2                  | 1                      | 0.99 (0.85, 1.15)                                    | 1.19 (0.90, 1.57)              | 0.99 (0.81, 1.20) |                    |                           |                    |
| Model 3                  | 1                      | 0.92 (0.79, 1.07)                                    | 0.93 (0.70, 1.23)              | 0.99 (0.82, 1.21) |                    |                           |                    |
| <b>FEV1%, predicted</b>  |                        |                                                      |                                |                   |                    |                           |                    |
|                          | Quintile 1             | Quintile 2                                           | Quintile 3                     | Quintile 4        | Quintile 5         | Trend (per 1 SD decrease) | p-race interaction |
| <b>Blacks</b>            |                        |                                                      |                                |                   |                    |                           |                    |
| Dementia cases, <i>n</i> | 79                     | 92                                                   | 78                             | 89                | 133                |                           |                    |

|                              |                   |                   |                   |                   |            |                                 |                       |
|------------------------------|-------------------|-------------------|-------------------|-------------------|------------|---------------------------------|-----------------------|
| Person-years                 | 10,737            | 12,666            | 13,668            | 14,750            | 19,757     |                                 |                       |
| Incident Rate*               | 7.4               | 7.3               | 5.7               | 6.0               | 6.7        |                                 |                       |
| <b>Hazard ratio (95% CI)</b> |                   |                   |                   |                   |            |                                 |                       |
| Model 1                      | 1.39 (1.05, 1.85) | 1.16 (0.89, 1.52) | 0.82 (0.62, 1.09) | 0.94 (0.72, 1.23) | 1          | 1.11 (1.00, 1.21)               |                       |
| Model 2                      | 1.41 (1.06, 1.89) | 1.16 (0.88, 1.52) | 0.83 (0.63, 1.10) | 0.94 (0.72, 1.24) | 1          | 1.11 (1.00, 1.23)               | 0.58                  |
| Model 3                      | 1.24 (0.92, 1.67) | 1.03 (0.78, 1.36) | 0.71 (0.54, 0.95) | 0.87 (0.66, 1.14) | 1          | 1.07 (0.97, 1.17)               | 0.87                  |
|                              |                   |                   |                   |                   |            |                                 | 0.83                  |
| <b>Whites</b>                |                   |                   |                   |                   |            |                                 |                       |
| Dementia cases, <i>n</i>     | 196               | 190               | 168               | 201               | 181        |                                 |                       |
| Person-years                 | 39,894            | 44,436            | 45,731            | 45,365            | 41,308     |                                 |                       |
| Incident Rate*               | 4.9               | 4.3               | 3.7               | 4.4               | 4.4        |                                 |                       |
| <b>Hazard ratio (95% CI)</b> |                   |                   |                   |                   |            |                                 |                       |
| Model 1                      | 1.37 (1.12, 1.69) | 1.11 (0.91, 1.36) | 0.98 (0.79, 1.20) | 1.15 (0.94, 1.41) | 1          | 1.15 (1.07, 1.23)               |                       |
| Model 2                      | 1.17 (0.94, 1.45) | 1.02 (0.75, 1.15) | 0.93 (0.75, 1.15) | 1.14 (0.93, 1.39) | 1          | 1.07 (1.00, 1.17)               |                       |
| Model 3                      | 1.06 (0.85, 1.32) | 0.97 (0.79, 1.20) | 0.91 (0.73, 1.12) | 1.12 (0.92, 1.38) | 1          | 1.03 (0.95, 1.11)               |                       |
| <b>FVC%, predicted</b>       |                   |                   |                   |                   |            |                                 |                       |
|                              | Quintile 1        | Quintile 2        | Quintile 3        | Quintile 4        | Quintile 5 | Trend<br>(per 1 SD<br>decrease) | p-race<br>interaction |
| <b>Blacks</b>                |                   |                   |                   |                   |            |                                 |                       |
| Dementia cases, <i>n</i>     | 97                | 81                | 85                | 94                | 114        |                                 |                       |
| Person-years                 | 12,543            | 12,294            | 13,078            | 14,421            | 19,242     |                                 |                       |
| Incident Rate*               | 7.7               | 6.6               | 6.5               | 6.5               | 5.9        |                                 |                       |
| <b>Hazard ratio (95% CI)</b> |                   |                   |                   |                   |            |                                 |                       |
| Model 1                      | 1.50 (1.14, 1.97) | 1.19 (0.89, 1.58) | 1.12 (0.84, 1.49) | 1.16 (0.88, 1.52) | 1          | 1.09 (1.00, 1.17)               | 0.26                  |
| Model 2                      | 1.49 (1.13, 1.97) | 1.18 (0.89, 1.58) | 1.12 (0.84, 1.48) | 1.16 (0.88, 1.53) | 1          | 1.09 (1.00, 1.17)               | 0.44                  |
| Model 3                      | 1.27 (0.95, 1.69) | 1.17 (0.88, 1.57) | 0.96 (0.72, 1.28) | 1.10 (0.83, 1.45) | 1          | 1.04 (0.96, 1.14)               | 0.97                  |
| <b>Whites</b>                |                   |                   |                   |                   |            |                                 |                       |
| Dementia cases, <i>n</i>     | 186               | 211               | 172               | 203               | 164        |                                 |                       |
| Person-years                 | 39,528            | 44,530            | 45,665            | 45,439            | 41,572     |                                 |                       |
| Incident Rate*               | 4.7               | 4.7               | 3.8               | 4.5               | 3.9        |                                 |                       |

| Hazard ratio (95% CI)    |                   |                   |                   |                   |            |                                 |                       |
|--------------------------|-------------------|-------------------|-------------------|-------------------|------------|---------------------------------|-----------------------|
| Model 1                  | 1.42 (1.15, 1.76) | 1.33 (1.08, 1.63) | 1.09 (0.88, 1.35) | 1.30 (1.06, 1.59) | 1          | 1.16 (1.08, 1.25)               |                       |
| Model 2                  | 1.29 (1.04, 1.60) | 1.26 (1.02, 1.54) | 1.06 (0.86, 1.32) | 1.29 (1.05, 1.58) | 1          | 1.12 (1.04, 1.21)               |                       |
| Model 3                  | 1.06 (0.85, 1.33) | 1.18 (0.96, 1.46) | 1.02 (0.82, 1.26) | 1.23 (1.00, 1.51) | 1          | 1.04 (0.97, 1.12)               |                       |
| FEV1/FVC%, predicted     |                   |                   |                   |                   |            |                                 |                       |
|                          | Quintile 1        | Quintile 2        | Quintile 3        | Quintile 4        | Quintile 5 | Trend<br>(per 1 SD<br>decrease) | p-race<br>interaction |
| <b>Blacks</b>            |                   |                   |                   |                   |            |                                 |                       |
| Dementia cases, <i>n</i> | 76                | 75                | 81                | 112               | 127        |                                 |                       |
| Person-years             | 11,821            | 13,072            | 14,201            | 15,312            | 17,173     |                                 |                       |
| Incident Rate*           | 6.4               | 5.7               | 5.7               | 7.3               | 7.4        |                                 |                       |
| Hazard ratio (95% CI)    |                   |                   |                   |                   |            |                                 |                       |
| Model 1                  | 1.05 (0.79, 1.39) | 0.88 (0.66, 1.17) | 0.89 (0.67, 1.17) | 0.89 (0.67, 1.17) | 1          | 1.03 (0.93, 1.14)               | 0.91                  |
| Model 2                  | 1.04 (0.77, 1.39) | 0.89 (0.67, 1.18) | 0.89 (0.67, 1.18) | 1.22 (0.95, 1.58) | 1          | 1.03 (0.93, 1.14)               | 0.83                  |
| Model 3                  | 0.99 (0.73, 1.33) | 0.95 (0.71, 1.26) | 0.86 (0.65, 1.14) | 1.29 (1.00, 1.67) | 1          | 1.03 (0.92, 1.14)               | 0.94                  |
| <b>Whites</b>            |                   |                   |                   |                   |            |                                 |                       |
| Dementia cases, <i>n</i> | 181               | 172               | 185               | 175               | 223        |                                 |                       |
| Person-years             | 41,013            | 45,250            | 44,924            | 44,068            | 41,479     |                                 |                       |
| Incident Rate*           | 4.4               | 3.8               | 4.1               | 4.0               | 5.4        |                                 |                       |
| Hazard ratio (95% CI)    |                   |                   |                   |                   |            |                                 |                       |
| Model 1                  | 0.93 (0.77, 1.14) | 0.80 (0.65, 0.98) | 0.80 (0.66, 0.98) | 0.77 (0.63, 0.93) | 1          | 1.03 (0.96, 1.11)               |                       |
| Model 2                  | 0.77 (0.63, 0.95) | 0.73 (0.60, 0.90) | 0.77 (0.63, 0.93) | 0.74 (0.61, 0.91) | 1          | 0.96 (0.89, 1.04)               |                       |
| Model 3                  | 0.88 (0.71, 1.09) | 0.80 (0.65, 0.98) | 0.86 (0.70, 1.05) | 0.79 (0.64, 0.96) | 1          | 0.99 (0.92, 1.07)               |                       |

\*Per 1,000 person-years

Model 1: Cox regression adjusted for age, sex, center, education level, and race-center (5-level variable)

Model 2: Model 1 + additional adjustment for cigarette smoking and pack-years of smoking

Model 3: Model 2 + additional adjustment for physical activity, body mass index, systolic blood pressure, blood pressure medication use, diabetes, HDL cholesterol, LDL cholesterol, lipid lowering medications, prevalent coronary heart disease, heart failure, stroke and APOE genotype



## Supplemental Table 5

Objective indices of lung function and risk of incident dementia according to follow-up time\*: The Atherosclerosis Risk in Communities (ARIC) study, 1996-2013

|                                              | FEV1%, predicted  |                   |                   |                   |        | Trend (per 1-SD decrease) |
|----------------------------------------------|-------------------|-------------------|-------------------|-------------------|--------|---------------------------|
|                                              | Q1                | Q2                | Q3                | Q4                | Q5     |                           |
| <b>Before the median follow up cutpoint*</b> |                   |                   |                   |                   |        |                           |
| Dementia cases, n                            | 202               | 170               | 135               | 159               | 167    |                           |
| Person-years                                 | 49,426            | 55,277            | 57,450            | 58,093            | 58,979 |                           |
| Incident Rate (per 1000 person-years)        | 4.1               | 3.1               | 2.3               | 2.7               | 2.8    |                           |
| Hazard Ratio (95% CI)                        |                   |                   |                   |                   |        |                           |
| Model 1                                      | 1.65 (1.34, 2.04) | 1.25 (1.01, 1.55) | 0.94 (0.75, 1.18) | 1.07 (0.86, 1.33) | 1      | 1.21 (1.13, 1.29)         |
| Model 2                                      | 1.49 (1.20, 1.86) | 1.19 (0.96, 1.48) | 0.91 (0.73, 1.15) | 1.06 (0.85, 1.32) | 1      | 1.17 (1.07, 1.25)         |
| Model 3                                      | 1.32 (1.06, 1.65) | 1.09 (0.87, 1.36) | 0.85 (0.68, 1.07) | 1.02 (0.82, 1.27) | 1      | 1.11 (1.03, 1.19)         |
| <b>After the median follow up cutpoint*</b>  |                   |                   |                   |                   |        |                           |
| Dementia cases, n                            | 73                | 112               | 111               | 131               | 147    |                           |
| Person-years                                 | 1,206             | 1,825             | 1,950             | 2,022             | 2,087  |                           |
| Incident Rate (per 1000 person-years)        | 60.5              | 61.4              | 56.9              | 64.8              | 70.4   |                           |
| Hazard Ratio (95% CI)                        |                   |                   |                   |                   |        |                           |
| Model 1                                      | 0.91 (0.68, 1.21) | 0.95 (0.74, 1.21) | 0.87 (0.68, 1.12) | 1.07 (0.84, 1.36) | 1      | 0.98 (0.90, 1.09)         |
| Model 2                                      | 0.85 (0.63, 1.15) | 0.92 (0.71, 1.18) | 0.86 (0.70, 1.10) | 1.06 (0.84, 1.35) | 1      | 0.97 (0.87, 1.07)         |
| Model 3                                      | 0.79 (0.58, 1.06) | 0.85 (0.66, 1.10) | 0.81 (0.63, 1.05) | 1.02 (0.80, 1.29) | 1      | 0.93 (0.84, 1.03)         |
| <b>FVC%, predicted</b>                       |                   |                   |                   |                   |        |                           |

|                                              | Q1                | Q2                | Q3                | Q4                | Q5     | Trend (per 1-SD decrease) |
|----------------------------------------------|-------------------|-------------------|-------------------|-------------------|--------|---------------------------|
| <b>Before the median follow up cutpoint*</b> |                   |                   |                   |                   |        |                           |
| Dementia cases, n                            | 187               | 191               | 146               | 162               | 147    |                           |
| Person-years                                 | 50,699            | 55,019            | 56,869            | 57,903            | 58,736 |                           |
| Incident Rate<br>(per 1000 person-<br>years) | 3.7               | 3.5               | 2.6               | 2.8               | 2.5    |                           |
| Hazard Ratio (95% CI)                        |                   |                   |                   |                   |        |                           |
| Model 1                                      | 1.72 (1.38, 2.14) | 1.59 (1.28, 1.98) | 1.14 (0.90, 1.43) | 1.26 (1.01, 1.58) | 1      | 1.23 (1.14, 1.32)         |
| Model 2                                      | 1.60 (1.28, 1.99) | 1.53 (1.23, 1.91) | 1.11 (0.88, 1.40) | 1.25 (1.00, 1.57) | 1      | 1.19 (1.12, 1.28)         |
| Model 3                                      | 1.31 (1.05, 1.65) | 1.44 (1.15, 1.79) | 1.01 (0.80, 1.28) | 1.17 (0.93, 1.46) | 1      | 1.14 (1.06, 1.23)         |
| <b>After the median follow up cutpoint*</b>  |                   |                   |                   |                   |        |                           |
| Dementia cases, n                            | 96                | 101               | 111               | 135               | 131    |                           |
| Person-years                                 | 1,373             | 1,805             | 1,875             | 1,957             | 2,079  |                           |
| Incident Rate<br>(per 1000 person-<br>years) | 69.9              | 56.0              | 59.2              | 69.0              | 63.0   |                           |
| Hazard Ratio (95% CI)                        |                   |                   |                   |                   |        |                           |
| Model 1                                      | 1.10 (0.85, 1.44) | 0.93 (0.72, 1.21) | 1.03 (0.80, 1.33) | 1.23 (0.97, 1.57) | 1      | 0.99 (0.90, 1.08)         |
| Model 2                                      | 1.07 (0.82, 1.40) | 0.92 (0.71, 1.20) | 1.02 (0.79, 1.32) | 1.23 (0.97, 1.57) | 1      | 0.97 (0.89, 1.06)         |
| Model 3                                      | 0.95 (0.72, 1.26) | 0.89 (0.68, 1.15) | 0.94 (0.73, 1.22) | 1.19 (0.93, 1.51) | 1      | 0.94 (0.85, 1.03)         |

\*Follow-up stratified at the median follow-up for events, which was 23.0 years

## Supplemental Table 6

Weighted\* odds ratios (ORs) and 95% confidence intervals (CI) of lung disease categories and objective lung function measures with dementia or MCI among never smokers: The Atherosclerosis Risk in Communities (ARIC) study, 1987-2013

|                    |          | Lung Disease Category |                                                      |                                |                   |
|--------------------|----------|-----------------------|------------------------------------------------------|--------------------------------|-------------------|
|                    |          | Normal                | Respiratory symptoms with normal spirometric results | Restrictive impairment pattern | COPD pattern      |
|                    | <i>N</i> | 1679                  | 894                                                  | 103                            | 239               |
| Dementia or MCI, n |          | 402                   | 247                                                  | 38                             | 76                |
| Model 1            |          | 1                     | 1.24 (1.02, 1.52)                                    | 2.10 (1.30, 3.39)              | 1.65 (1.19, 2.28) |
| Model 3            |          | 1                     | 1.17 (0.96, 1.44)                                    | 1.69 (1.04, 2.76)              | 1.72 (1.23, 2.40) |
|                    |          | FEV1%, predicted      |                                                      |                                |                   |
|                    |          | Quartile 1            | Quartile 2                                           | Quartile 3                     | Quartile 4        |
|                    | <i>N</i> | 580                   | 712                                                  | 761                            | 862               |
| Dementia or MCI, n |          | 193                   | 164                                                  | 181                            | 225               |
| Model 1            |          | 1.58 (1.22, 2.05)     | 0.97 (0.75, 1.25)                                    | 0.90 (0.71, 1.16)              | 1                 |
| Model 3            |          | 1.43 (1.10, 1.87)     | 0.91 (0.70, 1.18)                                    | 0.84 (0.66, 1.09)              | 1                 |
|                    |          | FVC%, predicted       |                                                      |                                |                   |
|                    |          | Quartile 1            | Quartile 2                                           | Quartile 3                     | Quartile 4        |
|                    | <i>N</i> | 628                   | 778                                                  | 735                            | 774               |
| Dementia or MCI, n |          | 187                   | 201                                                  | 183                            | 192               |
| Model 1            |          | 1.43 (1.10, 1.87)     | 1.20 (0.93, 1.54)                                    | 1.13 (0.88, 1.46)              | 1                 |
| Model 3            |          | 1.29 (0.98, 1.69)     | 1.11 (0.86, 1.43)                                    | 1.07 (0.83, 1.39)              | 1                 |
|                    |          | FEV1/FVC%, predicted  |                                                      |                                |                   |
|                    |          | Quartile 1            | Quartile 2                                           | Quartile 3                     | Quartile 4        |
|                    | <i>N</i> | 556                   | 740                                                  | 784                            | 835               |
| Dementia or MCI, n |          | 156                   | 169                                                  | 196                            | 242               |
| Model 1            |          | 1.07 (0.83, 1.40)     | 0.79 (0.62, 1.02)                                    | 0.87 (0.68, 1.12)              | 1                 |
| Model 3            |          | 1.11 (0.85, 1.46)     | 0.81 (0.62, 1.04)                                    | 0.87 (0.68, 1.11)              | 1                 |

\*Inverse-probability weighting was used.

---

Model 1: Logistic regression adjusted for age, sex, center, education level, and race-center (5-level variable)

Model 3: Model 1 + additional adjustment for physical activity, body mass index, systolic blood pressure, blood pressure medication use, diabetes, HDL cholesterol, LDL cholesterol, lipid lowering medications, prevalent coronary heart disease, heart failure, stroke and APOE genotype

---

## Supplemental Table 7

Race-stratified weighted\* odds ratios (ORs) and 95% confidence intervals (CI) of lung disease categories, FEV1% predicted, FVC% predicted and FEV1/FVC% predicted with dementia or MCI: The Atherosclerosis Risk in Communities (ARIC) study, 1987-2013

|                    |                   | Lung Disease Category |                                                      |                                |              | Type III p-value | Effect Modification by Race |
|--------------------|-------------------|-----------------------|------------------------------------------------------|--------------------------------|--------------|------------------|-----------------------------|
|                    |                   | Normal                | Respiratory symptoms with normal spirometric results | Restrictive impairment pattern | COPD pattern |                  |                             |
| <b>Blacks</b>      |                   |                       |                                                      |                                |              |                  |                             |
| Dementia or MCI, n | 180               | 133                   | 11                                                   | 51                             |              |                  |                             |
| Model 1            | 1                 | 0.97 (0.71, 1.31)     | 0.88 (0.36, 2.11)                                    | 1.57 (1.02, 2.42)              | 0.20         | P=0.04           |                             |
| Model 2            | 1                 | 1.02 (0.75, 1.38)     | 0.89 (0.35, 2.26)                                    | 1.76 (1.13, 2.74)              | 0.12         | P=0.04           |                             |
| Model 3            | 1                 | 1.13 (0.82, 1.54)     | 0.80 (0.32, 1.99)                                    | 2.13 (1.34, 3.40)              | 0.03         | P=0.04           |                             |
| <b>Whites</b>      |                   |                       |                                                      |                                |              |                  |                             |
| Dementia or MCI, n | 541               | 385                   | 76                                                   | 161                            |              |                  |                             |
| Model 1            | 1                 | 1.22 (1.03, 1.44)     | 2.32 (1.65, 3.26)                                    | 1.26 (1.01, 1.59)              | <.0001       |                  |                             |
| Model 2            | 1                 | 1.20 (1.01, 1.42)     | 2.23 (1.58, 3.15)                                    | 1.19 (0.94, 1.52)              | 0.0003       |                  |                             |
| Model 3            | 1                 | 1.11 (0.93, 1.31)     | 1.79 (1.27, 2.54)                                    | 1.21 (0.96, 1.54)              | 0.01         |                  |                             |
|                    |                   | FEV1%, predicted      |                                                      |                                |              | Type III p-value | Effect Modification By Race |
|                    |                   | Quartile 1            | Quartile 2                                           | Quartile 3                     | Quartile 4   |                  |                             |
| <b>Blacks</b>      |                   |                       |                                                      |                                |              |                  |                             |
| Dementia or MCI, n |                   |                       |                                                      |                                |              |                  |                             |
| Model 1            | 1.72 (1.20, 2.46) | 1.12 (0.77, 1.63)     | 0.94 (0.64, 1.38)                                    | 1                              | 0.016        | P=0.66           |                             |
| Model 2            | 1.82 (1.26, 2.63) | 1.21 (0.83, 1.76)     | 0.99 (0.67, 1.45)                                    | 1                              | 0.011        | P=0.60           |                             |
| Model 3            | 1.82 (1.24, 2.69) | 1.18 (0.80, 1.75)     | 0.92 (0.62, 1.36)                                    | 1                              | 0.008        | P=0.49           |                             |
| <b>Whites</b>      |                   |                       |                                                      |                                |              |                  |                             |
| Dementia or MCI, n |                   |                       |                                                      |                                |              |                  |                             |
| Model 1            | 1.33 (1.08, 1.64) | 1.01 (0.82, 1.25)     | 0.92 (0.75, 1.14)                                    | 1                              | 0.004        |                  |                             |
| Model 2            | 1.27 (1.02, 1.57) | 0.99 (0.80, 1.23)     | 0.92 (0.74, 1.14)                                    | 1                              | 0.02         |                  |                             |
| Model 3            | 1.17 (0.94, 1.45) | 0.95 (0.76, 1.18)     | 0.88 (0.71, 1.10)                                    | 1                              | 0.06         |                  |                             |

| FVC%, predicted      |                   |                   |                   |            |                  |                             |
|----------------------|-------------------|-------------------|-------------------|------------|------------------|-----------------------------|
|                      | Quartile 1        | Quartile 2        | Quartile 3        | Quartile 4 | Type III p-value | Effect Modification By Race |
| <b>Blacks</b>        |                   |                   |                   |            |                  |                             |
| Dementia or MCI, n   |                   |                   |                   |            |                  |                             |
| Model 1              | 1.68 (1.18, 2.39) | 0.99 (0.67, 1.47) | 0.94 (0.65, 1.36) | 1          | 0.01             | P=0.26                      |
| Model 2              | 1.67 (1.17, 2.39) | 0.98 (0.66, 1.46) | 0.92 (0.64, 1.33) | 1          | 0.01             | P=0.26                      |
| Model 3              | 1.74 (1.20, 2.52) | 0.91 (0.60, 1.37) | 0.92 (0.63, 1.34) | 1          | 0.006            | P=0.12                      |
| <b>Whites</b>        |                   |                   |                   |            |                  |                             |
| Dementia or MCI, n   |                   |                   |                   |            |                  |                             |
| Model 1              | 1.38 (1.11, 1.70) | 1.23 (1.00, 1.51) | 1.13 (0.91, 1.40) | 1          | 0.02             |                             |
| Model 2              | 1.32 (1.07, 1.64) | 1.21 (0.98, 1.49) | 1.12 (0.90, 1.39) | 1          | 0.06             |                             |
| Model 3              | 1.17 (0.94, 1.45) | 1.13 (0.91, 1.39) | 1.08 (0.87, 1.34) | 1          | 0.53             |                             |
| FEV1/FVC%, predicted |                   |                   |                   |            |                  |                             |
|                      | Quartile 1        | Quartile 2        | Quartile 3        | Quartile 4 | Type III p-value | Effect Modification By Race |
| <b>Blacks</b>        |                   |                   |                   |            |                  |                             |
| Dementia or MCI, n   |                   |                   |                   |            |                  |                             |
| Model 1              | 1.10 (0.76, 1.59) | 0.66 (0.44, 0.99) | 0.97 (0.67, 1.38) | 1          | 0.07             | P=0.60                      |
| Model 2              | 1.20 (0.82, 1.75) | 0.70 (0.46, 1.05) | 0.99 (0.69, 1.42) | 1          | 0.07             | P=0.52                      |
| Model 3              | 1.26 (0.85, 1.87) | 0.70 (0.46, 0.97) | 1.02 (0.70, 1.47) | 1          | 0.06             | P=0.60                      |
| <b>Whites</b>        |                   |                   |                   |            |                  |                             |
| Dementia or MCI, n   |                   |                   |                   |            |                  |                             |
| Model 1              | 0.98 (0.80, 1.20) | 0.82 (0.67, 1.01) | 1.01 (0.82, 1.24) | 1          | 0.17             |                             |
| Model 2              | 0.91 (0.74, 1.12) | 0.80 (0.65, 0.99) | 1.00 (0.81, 1.23) | 1          | 0.13             |                             |
| Model 3              | 1.02 (0.83, 1.27) | 0.85 (0.69, 1.05) | 1.04 (0.85, 1.29) | 1          | 0.22             |                             |

\*Inverse-probability weighting was used.  
Model 1: Logistic regression adjusted for age, sex, center, education level, and race-center (5-level variable)  
Model 3: Model 1 + additional adjustment for physical activity, body mass index, systolic blood pressure, blood pressure medication use, diabetes, HDL cholesterol, LDL cholesterol, lipid lowering medications, prevalent coronary heart disease, heart failure, stroke and APOE genotype

### Supplemental Table 8 – FEV1/FVC% predicted & adjudicated outcomes

Inverse-probability weighted odds ratios (OR) and 95% confidence intervals (CI) of FEV1/FEC percent of predicted quartile categories with dementia, mild cognitive impairment (MCI), Alzheimer's disease and cerebrovascular disease: The Atherosclerosis Risk in Communities (ARIC) study, 1987-2013

| N                             | FEV1/FVC%, predicted |                    |                    |                    | Trend<br>(per 1 SD<br>decrease) |
|-------------------------------|----------------------|--------------------|--------------------|--------------------|---------------------------------|
|                               | Quartile 1<br>1472   | Quartile 2<br>1473 | Quartile 3<br>1471 | Quartile 4<br>1473 |                                 |
| Dementia/MCI, n               | 397                  | 329                | 388                | 424                |                                 |
| Odds ratio (95% CI)           |                      |                    |                    |                    |                                 |
| Model 1                       | 1.00 (0.83, 1.19)    | 0.78 (0.65, 0.94)  | 0.99 (0.83, 1.19)  | 1                  | 1.00 (0.93, 1.06)               |
| Model 2                       | 0.96 (0.80, 1.16)    | 0.77 (0.64, 0.93)  | 0.98 (0.82, 1.18)  | 1                  | 0.98 (0.92, 1.05)               |
| Model 3                       | 1.05 (0.87, 1.27)    | 0.80 (0.67, 0.97)  | 1.01 (0.84, 1.22)  | 1                  | 1.01 (0.95, 1.09)               |
| Dementia, n                   | 73                   | 60                 | 74                 | 91                 |                                 |
| Odds ratio (95% CI)           |                      |                    |                    |                    |                                 |
| Model 1                       | 0.92 (0.63, 1.33)    | 0.75 (0.50, 1.10)  | 0.95 (0.66, 1.38)  | 1                  | 0.93 (0.80, 1.07)               |
| Model 2                       | 0.85 (0.58, 1.25)    | 0.73 (0.50, 1.08)  | 0.93 (0.65, 1.35)  | 1                  | 0.89 (0.77, 1.03)               |
| Model 3                       | 0.92 (0.61, 1.38)    | 0.74 (0.49, 1.12)  | 0.94 (0.64, 1.38)  | 1                  | 0.92 (0.78, 1.08)               |
| MCI, n                        | 324                  | 269                | 314                | 333                |                                 |
| Odds ratio (95% CI)           |                      |                    |                    |                    |                                 |
| Model 1                       | 1.04 (0.86, 1.26)    | 0.80 (0.66, 0.97)  | 1.02 (0.84, 1.23)  | 1                  | 1.02 (0.95, 1.10)               |
| Model 2                       | 1.02 (0.84, 1.24)    | 0.79 (0.65, 0.97)  | 1.01 (0.84, 1.22)  | 1                  | 1.02 (0.94, 1.09)               |
| Model 3                       | 1.12 (0.92, 1.36)    | 0.83 (0.68, 1.01)  | 1.04 (0.86, 1.26)  | 1                  | 1.05 (0.97, 1.13)               |
| Alzheimer's disease, n        | 239                  | 212                | 265                | 288                |                                 |
| Odds ratio (95% CI)           |                      |                    |                    |                    |                                 |
| Model 1                       | 0.86 (0.70, 1.06)    | 0.72 (0.58, 0.90)  | 0.98 (0.79, 1.20)  | 1                  | 0.94 (0.87, 1.02)               |
| Model 2                       | 0.86 (0.69, 1.07)    | 0.72 (0.58, 0.90)  | 0.97 (0.79, 1.19)  | 1                  | 0.94 (0.86, 1.02)               |
| Model 3                       | 0.93 (0.75, 1.16)    | 0.75 (0.60, 0.93)  | 1.00 (0.81, 1.23)  | 1                  | 0.97 (0.89, 1.06)               |
| Cerebrovascular<br>disease, n | 42                   | 43                 | 47                 | 56                 |                                 |
| Odds ratio (95% CI)           |                      |                    |                    |                    |                                 |
| Model 1                       | 1.01 (0.64, 1.60)    | 0.83 (0.53, 1.30)  | 1.13 (0.72, 1.78)  | 1                  | 1.06 (0.89, 1.26)               |
| Model 2                       | 0.84 (0.53, 1.33)    | 0.78 (0.49, 1.25)  | 1.08 (0.69, 1.67)  | 1                  | 0.99 (0.82, 1.18)               |

|         |                   |                   |                   |   |                   |
|---------|-------------------|-------------------|-------------------|---|-------------------|
| Model 3 | 1.00 (0.63, 1.60) | 0.86 (0.54, 1.37) | 1.10 (0.70, 1.72) | 1 | 1.05 (0.88, 1.26) |
|---------|-------------------|-------------------|-------------------|---|-------------------|

Model 1: Logistic regression adjusted for age, sex, center, education level, and race-center (5-level variable)

Model 2: Model 1 + additional adjustment for cigarette smoking and pack-years of smoking

Model 3: Model 2 + additional adjustment for physical activity, body mass index, systolic blood pressure, blood pressure medication use, diabetes, HDL cholesterol, LDL cholesterol, lipid lowering medications, prevalent coronary heart disease, heart failure, stroke and APOE genotype

epidemiological studies. The American Journal of Clinical Nutrition. 1982;36(5):936-942. doi: 10.1093/ajcn/36.5.936.

1. Baecke JA, Burema J, Frijters JE. A short questionnaire for the measurement of habitual physical activity in



**Supplemental Table 9**

Odds ratios (ORs) and 95% confidence intervals (CI) of lung disease categories with dementia, mild cognitive impairment (MCI), AD-type dementia or MCI, and dementia or MCI due to cerebrovascular disease: The Atherosclerosis Risk in Communities (ARIC) study, 1987-2013

|                                       | Lung Disease Category |                 |                                                                     |                                          |                     |
|---------------------------------------|-----------------------|-----------------|---------------------------------------------------------------------|------------------------------------------|---------------------|
|                                       | <i>N</i>              | Normal<br>2,953 | Respiratory symptoms<br>with normal spirometric<br>results<br>1,967 | Restrictive<br>impairment pattern<br>239 | COPD pattern<br>730 |
| Dementia or MCI, n                    |                       | 721             | 518                                                                 | 87                                       | 212                 |
| Model 1                               |                       | 1               | 1.12 (0.98, 1.28)                                                   | 1.87 (1.40, 2.49)                        | 1.27 (1.05, 1.53)   |
| Model 2                               |                       | 1               | 1.12 (0.98, 1.29)                                                   | 1.85 (1.39, 2.48)                        | 1.26 (1.04, 1.53)   |
| Model 3                               |                       | 1               | 1.09 (0.94, 1.25)                                                   | 1.63 (1.21, 2.19)                        | 1.30 (1.07, 1.59)   |
| Model 4                               |                       | 1               | 1.08 (0.94, 1.24)                                                   | 1.59 (1.18, 2.15)                        | 1.29 (1.06, 1.57)   |
| Dementia, n                           |                       | 147             | 94                                                                  | 15                                       | 42                  |
| Model 1                               |                       | 1               | 0.97 (0.73, 1.29)                                                   | 1.50 (0.81, 2.78)                        | 1.19 (0.81, 1.75)   |
| Model 2                               |                       | 1               | 0.95 (0.71, 1.27)                                                   | 1.43 (0.77, 2.65)                        | 1.15 (0.77, 1.71)   |
| Model 3                               |                       | 1               | 0.93 (0.69, 1.26)                                                   | 1.08 (0.57, 2.06)                        | 1.20 (0.79, 1.81)   |
| MCI, n                                |                       | 574             | 424                                                                 | 72                                       | 170                 |
| Model 1                               |                       | 1               | 1.15 (1.00, 1.34)                                                   | 1.91 (1.41, 2.58)                        | 1.28 (1.05, 1.56)   |
| Model 2                               |                       | 1               | 1.16 (1.00, 1.35)                                                   | 1.91 (1.41, 2.60)                        | 1.29 (1.05, 1.59)   |
| Model 3                               |                       | 1               | 1.13 (0.97, 1.31)                                                   | 1.73 (1.27, 2.36)                        | 1.33 (1.08, 1.64)   |
| AD dementia or MCI, n                 |                       | 474             | 344                                                                 | 59                                       | 127                 |
| Model 1                               |                       | 1               | 1.13 (0.97, 1.33)                                                   | 1.92 (1.39, 2.67)                        | 1.16 (0.93, 1.45)   |
| Model 2                               |                       | 1               | 1.15 (0.98, 1.35)                                                   | 1.96 (1.41, 2.72)                        | 1.19 (0.94, 1.49)   |
| Model 3                               |                       | 1               | 1.12 (0.95, 1.31)                                                   | 1.78 (1.27, 2.49)                        | 1.23 (0.97, 1.55)   |
| Cerebrovascular<br>dementia or MCI, n |                       | 88              | 62                                                                  | 12                                       | 26                  |
| Model 1                               |                       | 1               | 1.08 (0.77, 1.52)                                                   | 2.11 (1.09, 4.07)                        | 1.31 (0.83, 2.07)   |
| Model 2                               |                       | 1               | 1.06 (0.75, 1.49)                                                   | 1.99 (1.03, 3.88)                        | 1.22 (0.75, 1.97)   |
| Model 3                               |                       | 1               | 1.00 (0.70, 1.43)                                                   | 1.58 (0.80, 3.12)                        | 1.33 (0.81, 2.16)   |

Model 1: Logistic regression adjusted for age, sex, education level, and race-center (5-level variable)

Model 2: Model 1 + additional adjustment for cigarette smoking and pack-years of smoking

Model 3: Model 2 + additional adjustment for physical activity, body mass index, systolic blood pressure, blood pressure medication use, diabetes, HDL cholesterol, LDL cholesterol, lipid lowering medications, prevalent coronary

---

heart disease, heart failure, stroke and APOE genotype

Model 4: Model 3 + fibrinogen

**Supplemental Table 10**

Odds ratios (ORs) and 95% confidence intervals (CI) of FEV1 percent predicted quartile with dementia, mild cognitive impairment (MCI), AD-type dementia or MCI, and dementia or MCI due to cerebrovascular disease: The Atherosclerosis Risk in Communities (ARIC) study, 1987-2013

|                                       | FEV1%, predicted |                     |                     |                     | Trend<br>(per 1 SD<br>decrease) |                     |
|---------------------------------------|------------------|---------------------|---------------------|---------------------|---------------------------------|---------------------|
|                                       | <i>N</i>         | Quartile 1<br>1,473 | Quartile 2<br>1,471 | Quartile 3<br>1,472 |                                 | Quartile 4<br>1,473 |
| Dementia or MCI, n                    |                  | 450                 | 364                 | 346                 | 378                             |                     |
| Model 1                               |                  | 1.30 (1.09, 1.53)   | 0.99 (0.84, 1.18)   | 0.91 (0.77, 1.09)   | 1                               | 1.12 (1.05, 1.19)   |
| Model 2                               |                  | 1.28 (1.08, 1.53)   | 0.99 (0.83, 1.19)   | 0.91 (0.77, 1.09)   | 1                               | 1.11 (1.05, 1.19)   |
| Model 3                               |                  | 1.24 (1.04, 1.48)   | 0.97 (0.81, 1.15)   | 0.89 (0.75, 1.06)   | 1                               | 1.10 (1.04, 1.18)   |
| Model 4                               |                  | 1.23 (1.03, 1.47)   | 0.96 (0.81, 1.15)   | 0.88 (0.74, 1.05)   | 1                               | 1.10 (1.03, 1.17)   |
| Dementia, n                           |                  | 87                  | 59                  | 69                  | 83                              |                     |
| Model 1                               |                  | 1.19 (0.84, 1.67)   | 0.81 (0.56, 1.17)   | 0.92 (0.65, 1.31)   | 1                               | 1.06 (0.94, 1.20)   |
| Model 2                               |                  | 1.13 (0.79, 1.60)   | 0.79 (0.55, 1.15)   | 0.93 (0.65, 1.32)   | 1                               | 1.04 (0.92, 1.18)   |
| Model 3                               |                  | 1.02 (0.70, 1.47)   | 0.74 (0.50, 1.09)   | 0.89 (0.62, 1.28)   | 1                               | 1.01 (0.89, 1.15)   |
| MCI, n                                |                  | 363                 | 305                 | 277                 | 295                             |                     |
| Model 1                               |                  | 1.32 (1.10, 1.58)   | 1.04 (0.87, 1.25)   | 0.92 (0.76, 1.11)   | 1                               | 1.13 (1.06, 1.21)   |
| Model 2                               |                  | 1.32 (1.10, 1.59)   | 1.04 (0.87, 1.26)   | 0.92 (0.76, 1.11)   | 1                               | 1.13 (1.06, 1.21)   |
| Model 3                               |                  | 1.29 (1.07, 1.57)   | 1.02 (0.85, 1.24)   | 0.90 (0.75, 1.09)   | 1                               | 1.13 (1.05, 1.21)   |
| AD dementia or MCI, n                 |                  | 284                 | 223                 | 237                 | 260                             |                     |
| Model 1                               |                  | 1.19 (0.98, 1.45)   | 0.89 (0.73, 1.09)   | 0.90 (0.74, 1.11)   | 1                               | 1.07 (1.00, 1.15)   |
| Model 2                               |                  | 1.20 (0.98, 1.47)   | 0.89 (0.73, 1.10)   | 0.91 (0.74, 1.11)   | 1                               | 1.08 (1.00, 1.16)   |
| Model 3                               |                  | 1.19 (0.97, 1.47)   | 0.89 (0.72, 1.09)   | 0.89 (0.73, 1.10)   | 1                               | 1.08 (1.00, 1.16)   |
| Cerebrovascular<br>dementia or MCI, n |                  | 57                  | 53                  | 35                  | 43                              |                     |
| Model 1                               |                  | 1.59 (1.05, 2.43)   | 1.39 (0.91, 2.13)   | 0.89 (0.56, 1.42)   | 1                               | 1.26 (1.09, 1.46)   |
| Model 2                               |                  | 1.51 (0.98, 2.33)   | 1.37 (0.89, 2.09)   | 0.89 (0.56, 1.42)   | 1                               | 1.24 (1.07, 1.44)   |
| Model 3                               |                  | 1.41 (0.90, 2.19)   | 1.30 (0.84, 2.01)   | 0.85 (0.53, 1.36)   | 1                               | 1.22 (1.04, 1.42)   |

Model 1: Logistic regression adjusted for age, sex, center, education level, and race-center (5-level variable)

Model 2: Model 1 + additional adjustment for cigarette smoking and pack-years of smoking

Model 3: Model 2 + additional adjustment for physical activity, body mass index, systolic blood pressure, blood pressure medication use, diabetes, HDL cholesterol, LDL cholesterol, lipid lowering medications,

---

prevalent coronary heart disease, heart failure, stroke and APOE genotype  
Model 4: Model 3 + fibrinogen

**Supplemental Table 11**

Odds ratios (ORs) and 95% confidence intervals (CI) of FVC percent predicted quartile with dementia, mild cognitive impairment (MCI), AD-type dementia or MCI, and dementia or MCI due to cerebrovascular disease: The Atherosclerosis Risk in Communities (ARIC) study, 1987-2013

|                                       | FVC%, predicted |                     |                     |                     | Trend<br>(per 1 SD decrease) |                     |
|---------------------------------------|-----------------|---------------------|---------------------|---------------------|------------------------------|---------------------|
|                                       | <i>N</i>        | Quartile 1<br>1,472 | Quartile 2<br>1,473 | Quartile 3<br>1,471 |                              | Quartile 4<br>1,473 |
| Dementia or MCI, n                    |                 | 434                 | 381                 | 361                 | 362                          |                     |
| Model 1                               |                 | 1.30 (1.09, 1.54)   | 1.09 (0.92, 1.30)   | 1.03 (0.87, 1.23)   | 1                            | 1.14 (1.07, 1.21)   |
| Model 2                               |                 | 1.28 (1.08, 1.52)   | 1.08 (0.91, 1.29)   | 1.03 (0.87, 1.23)   | 1                            | 1.13 (1.06, 1.20)   |
| Model 3                               |                 | 1.21 (1.01, 1.44)   | 1.03 (0.87, 1.23)   | 1.01 (0.84, 1.20)   | 1                            | 1.10 (1.04, 1.18)   |
| Model 4                               |                 | 1.21 (1.01, 1.44)   | 1.04 (0.87, 1.24)   | 1.01 (0.84, 1.20)   | 1                            | 1.10 (1.03, 1.17)   |
| Dementia, n                           |                 | 80                  | 69                  | 71                  | 78                           |                     |
| Model 1                               |                 | 1.13 (0.80, 1.61)   | 0.98 (0.69, 1.41)   | 1.06 (0.74, 1.50)   | 1                            | 1.11 (0.98, 1.26)   |
| Model 2                               |                 | 1.08 (0.76, 1.54)   | 0.95 (0.66, 1.36)   | 1.06 (0.74, 1.50)   | 1                            | 1.09 (0.97, 1.23)   |
| Model 3                               |                 | 0.95 (0.66, 1.38)   | 0.84 (0.58, 1.22)   | 1.00 (0.70, 1.44)   | 1                            | 1.04 (0.91, 1.18)   |
| MCI, n                                |                 | 354                 | 312                 | 290                 | 284                          |                     |
| Model 1                               |                 | 1.33 (1.11, 1.60)   | 1.12 (0.93, 1.34)   | 1.03 (0.85, 1.24)   | 1                            | 1.14 (1.07, 1.22)   |
| Model 2                               |                 | 1.32 (1.10, 1.59)   | 1.11 (0.92, 1.34)   | 1.03 (0.85, 1.24)   | 1                            | 1.14 (1.07, 1.22)   |
| Model 3                               |                 | 1.26 (1.04, 1.53)   | 1.08 (0.89, 1.30)   | 1.02 (0.84, 1.23)   | 1                            | 1.12 (1.05, 1.20)   |
| AD dementia or MCI, n                 |                 | 284                 | 237                 | 238                 | 245                          |                     |
| Model 1                               |                 | 1.25 (1.03, 1.53)   | 1.00 (0.82, 1.23)   | 1.00 (0.81, 1.22)   | 1                            | 1.12 (1.04, 1.20)   |
| Model 2                               |                 | 1.26 (1.03, 1.53)   | 1.00 (0.81, 1.22)   | 1.00 (0.82, 1.22)   | 1                            | 1.12 (1.04, 1.20)   |
| Model 3                               |                 | 1.22 (1.00, 1.50)   | 0.98 (0.80, 1.20)   | 0.98 (0.80, 1.20)   | 1                            | 1.10 (1.03, 1.19)   |
| Cerebrovascular<br>dementia or MCI, n |                 | 57                  | 52                  | 43                  | 36                           |                     |
| Model 1                               |                 | 1.84 (1.18, 2.85)   | 1.65 (1.06, 2.57)   | 1.32 (0.83, 2.09)   | 1                            | 1.31 (1.13, 1.53)   |
| Model 2                               |                 | 1.76 (1.13, 2.75)   | 1.61 (1.03, 2.52)   | 1.32 (0.83, 2.09)   | 1                            | 1.29 (1.11, 1.51)   |
| Model 3                               |                 | 1.54 (0.97, 2.43)   | 1.44 (0.92, 2.28)   | 1.28 (0.80, 2.04)   | 1                            | 1.22 (1.04, 1.43)   |

Model 1: Logistic regression adjusted for age, sex, center, education level, and race-center (5-level variable)

Model 2: Model 1 + additional adjustment for cigarette smoking and pack-years of smoking

Model 3: Model 2 + additional adjustment for physical activity, body mass index, systolic blood pressure, blood pressure medication use, diabetes, HDL cholesterol, LDL cholesterol, lipid lowering medications, prevalent coronary heart disease, heart failure, stroke and APOE genotype

---

Model 4: Model 3 + fibrinogen
